# Supplementary material
Source: publisher figshare collection journal article supplement (https://sage.figshare.com/ndownloader/files/13024025)
Supplement: Supplementary file 1 [file 13024025]

| **Supplemental Table 3-1.** Range-find histopathological scores for animals administered allyl alcohol, 4,4'-methylenedianiline, or carbon tetrachloride for 1 or 5 days for Range-finding | | | | | | | | | | | | | | |
| --- | --- | --- | --- | --- | --- | --- | --- | --- | --- | --- | --- | --- | --- | --- |
| **Study** | **Animal Number** | **Toxicant** | **Day** | **Dose (mg/kg)** | **Fibrosis** | **Inflam-mation** | **Necrosis** | **Infiltration** | **Hyperplasia, bile duct** | **Cytoplasmic Alteration** | **Mitotic Alteration** | **Hypertrophy, Hepatocyte** | **Collagen Accumulation** | **Vacuolation** |
| Range-find | 1 | Allyl Alcohol | 1 | 0 | 0 | 0 | 0 | 1 | 0 | 0 | 0 | 0 | Not Evaluated | 0 |
| Range-find | 2 | Allyl Alcohol | 1 | 0 | 0 | 0 | 0 | 0 | 0 | 0 | 0 | 0 | Not Evaluated | 0 |
| Range-find | 3 | Allyl Alcohol | 1 | 0 | 0 | 0 | 0 | 0 | 0 | 0 | 0 | 0 | Not Evaluated | 0 |
| Range-find | 4 | Allyl Alcohol | 1 | 0 | 0 | 0 | 0 | 0 | 0 | 0 | 0 | 0 | Not Evaluated | 0 |
| Range-find | 5 | Allyl Alcohol | 1 | 0 | 0 | 0 | 0 | 0 | 0 | 0 | 0 | 0 | Not Evaluated | 0 |
| Range-find | 6 | Allyl Alcohol | 1 | 20.9 | 0 | 0 | 0 | 1 | 0 | 0 | 1 | 0 | Not Evaluated | 0 |
| Range-find | 7 | Allyl Alcohol | 1 | 20.9 | 0 | 0 | 0 | 0 | 0 | 0 | 0 | 0 | Not Evaluated | 0 |
| Range-find | 8 | Allyl Alcohol | 1 | 20.9 | 0 | 0 | 0 | 1 | 0 | 0 | 2 | 0 | Not Evaluated | 0 |
| Range-find | 9 | Allyl Alcohol | 1 | 20.9 | 0 | 0 | 0 | 1 | 0 | 0 | 2 | 0 | Not Evaluated | 0 |
| Range-find | 10 | Allyl Alcohol | 1 | 20.9 | 0 | 0 | 0 | 0 | 0 | 0 | 2 | 0 | Not Evaluated | 0 |
| Range-find | 11 | Allyl Alcohol | 1 | 27 | 0 | 0 | 0 | 0 | 0 | 0 | 2 | 0 | Not Evaluated | 0 |
| Range-find | 12 | Allyl Alcohol | 1 | 27 | 0 | 0 | 0 | 1 | 0 | 0 | 1 | 0 | Not Evaluated | 0 |
| Range-find | 13 | Allyl Alcohol | 1 | 27 | 0 | 0 | 0 | 0 | 0 | 0 | 2 | 0 | Not Evaluated | 0 |
| Range-find | 14 | Allyl Alcohol | 1 | 27 | 0 | 0 | 0 | 0 | 0 | 0 | 3 | 0 | Not Evaluated | 0 |
| Range-find | 15 | Allyl Alcohol | 1 | 27 | 0 | 0 | 0 | 0 | 0 | 0 | 4 | 0 | Not Evaluated | 0 |
| Range-find | 16 | Allyl Alcohol | 1 | 34.8 | 0 | 0 | 0 | 1 | 0 | 0 | 4 | 0 | Not Evaluated | 0 |
| Range-find | 17 | Allyl Alcohol | 1 | 34.8 | 0 | 0 | 0 | 1 | 0 | 0 | 2 | 0 | Not Evaluated | 0 |
| Range-find | 18 | Allyl Alcohol | 1 | 34.8 | 0 | 0 | 0 | 0 | 0 | 0 | 1 | 0 | Not Evaluated | 0 |
| Range-find | 19 | Allyl Alcohol | 1 | 34.8 | 0 | 0 | 0 | 0 | 0 | 0 | 3 | 0 | Not Evaluated | 0 |
| Range-find | 20 | Allyl Alcohol | 1 | 34.8 | 0 | 0 | 0 | 1 | 0 | 0 | 3 | 0 | Not Evaluated | 0 |
| Range-find | 21 | Allyl Alcohol | 1 | 45 | 0 | 0 | 0 | 0 | 0 | 1 | 1 | 0 | Not Evaluated | 0 |
| Range-find | 22 | Allyl Alcohol | 1 | 45 | 0 | 0 | 0 | 0 | 0 | 2 | 2 | 0 | Not Evaluated | 0 |
| Range-find | 23 | Allyl Alcohol | 1 | 45 | 0 | 2 | 2 | 0 | 1 | 0 | 1 | 1 | Not Evaluated | 0 |
| Range-find | 24 | Allyl Alcohol | 1 | 45 | 0 | 2 | 2 | 0 | 0 | 0 | 2 | 2 | Not Evaluated | 0 |
| Range-find | 25 | Allyl Alcohol | 1 | 45 | 0 | 3 | 1 | 0 | 1 | 1 | 0 | 1 | Not Evaluated | 0 |
| Range-find | 26 | Allyl Alcohol | 5 | 0 | 0 | 0 | 0 | 0 | 0 | 0 | 1 | 0 | Not Evaluated | 0 |
| Range-find | 27 | Allyl Alcohol | 5 | 0 | 0 | 0 | 0 | 0 | 0 | 0 | 0 | 0 | Not Evaluated | 0 |
| Range-find | 28 | Allyl Alcohol | 5 | 0 | 0 | 0 | 0 | 0 | 0 | 0 | 0 | 0 | Not Evaluated | 0 |
| Range-find | 29 | Allyl Alcohol | 5 | 0 | 0 | 0 | 0 | 0 | 0 | 0 | 0 | 0 | Not Evaluated | 0 |
| Range-find | 30 | Allyl Alcohol | 5 | 0 | 0 | 0 | 0 | 0 | 0 | 0 | 1 | 0 | Not Evaluated | 0 |
| Range-find | 31 | Allyl Alcohol | 5 | 20.9 | 0 | 0 | 0 | 0 | 0 | 0 | 3 | 0 | Not Evaluated | 0 |
| Range-find | 32 | Allyl Alcohol | 5 | 20.9 | 0 | 0 | 0 | 0 | 0 | 0 | 3 | 0 | Not Evaluated | 0 |
| Range-find | 33 | Allyl Alcohol | 5 | 20.9 | 0 | 0 | 0 | 1 | 0 | 3 | 3 | 0 | Not Evaluated | 0 |
| Range-find | 34 | Allyl Alcohol | 5 | 20.9 | 0 | 1 | 1 | 1 | 0 | 3 | 2 | 0 | Not Evaluated | 0 |
| Range-find | 35 | Allyl Alcohol | 5 | 20.9 | 0 | 0 | 0 | 0 | 0 | 0 | 2 | 0 | Not Evaluated | 0 |
| Range-find | 36 | Allyl Alcohol | 5 | 27 | 0 | 0 | 0 | 1 | 0 | 2 | 0 | 0 | Not Evaluated | 0 |
| Range-find | 37 | Allyl Alcohol | 5 | 27 | 1 | 0 | 2 | 0 | 1 | 4 | 4 | 0 | Not Evaluated | 0 |
| Range-find | 38 | Allyl Alcohol | 5 | 27 | 0 | 0 | 0 | 0 | 0 | 3 | 2 | 0 | Not Evaluated | 0 |
| Range-find | 39 | Allyl Alcohol | 5 | 27 | 0 | 0 | 0 | 0 | 0 | 0 | 0 | 0 | Not Evaluated | 0 |
| Range-find | 40 | Allyl Alcohol | 5 | 27 | 2 | 2 | 3 | 0 | 4 | 4 | 4 | 1 | Not Evaluated | 0 |
| Range-find | 41 | Allyl Alcohol | 5 | 34.8 | 0 | 0 | 0 | 0 | 0 | 2 | 1 | 0 | Not Evaluated | 0 |
| Range-find | 42 | Allyl Alcohol | 5 | 34.8 | 2 | 2 | 0 | 0 | 1 | 3 | 3 | 0 | Not Evaluated | 0 |
| Range-find | 43 | Allyl Alcohol | 5 | 34.8 | 1 | 2 | 2 | 0 | 2 | 2 | 3 | 1 | Not Evaluated | 0 |
| Range-find | 44 | Allyl Alcohol | 5 | 34.8 | 2 | 2 | 3 | 0 | 3 | 3 | 3 | 0 | Not Evaluated | 0 |
| Range-find | 45 | Allyl Alcohol | 5 | 34.8 | 2 | 2 | 2 | 0 | 3 | 2 | 3 | 0 | Not Evaluated | 0 |
| Range-find | 46 | Allyl Alcohol | 5 | 45 | 3 | 2 | 4 | 0 | 3 | 4 | 4 | 1 | Not Evaluated | 0 |
| Range-find | 47 | Allyl Alcohol | 5 | 45 | 3 | 3 | 4 | 0 | 3 | 3 | 4 | 0 | Not Evaluated | 0 |
| Range-find | 48 | Allyl Alcohol | 5 | 45 | 3 | 3 | 3 | 0 | 4 | 3 | 3 | 2 | Not Evaluated | 0 |
| Range-find | 49 | Allyl Alcohol | 5 | 45 | 2 | 2 | 3 | 0 | 2 | 4 | 4 | 1 | Not Evaluated | 0 |
| Range-find | 50 | Allyl Alcohol | 5 | 45 | 2 | 3 | 3 | 0 | 3 | 2 | 2 | 2 | Not Evaluated | 0 |
| Range-find | 101 | Carbon Tetrachloride | 1 | 0 | 0 | 0 | 0 | 0 | 0 | 0 | 0 | 0 | 0 | 0 |
| Range-find | 102 | Carbon Tetrachloride | 1 | 0 | 0 | 0 | 0 | 1 | 0 | 0 | 0 | 0 | 0 | 0 |
| Range-find | 103 | Carbon Tetrachloride | 1 | 0 | 0 | 0 | 0 | 1 | 0 | 0 | 0 | 0 | 0 | 0 |
| Range-find | 104 | Carbon Tetrachloride | 1 | 0 | 0 | 0 | 0 | 1 | 0 | 0 | 0 | 0 | 0 | 0 |
| Range-find | 105 | Carbon Tetrachloride | 1 | 0 | 0 | 0 | 0 | 0 | 0 | 0 | 0 | 0 | 0 | 0 |
| Range-find | 106 | Carbon Tetrachloride | 1 | 20 | 0 | 0 | 0 | 0 | 0 | 0 | 0 | 0 | 0 | 1 |
| Range-find | 107 | Carbon Tetrachloride | 1 | 20 | 0 | 0 | 0 | 0 | 0 | 0 | 0 | 0 | 0 | 0 |
| Range-find | 108 | Carbon Tetrachloride | 1 | 20 | 0 | 0 | 0 | 1 | 0 | 0 | 0 | 0 | 0 | 0 |
| Range-find | 109 | Carbon Tetrachloride | 1 | 20 | 0 | 0 | 0 | 1 | 0 | 0 | 0 | 0 | 0 | 0 |
| Range-find | 110 | Carbon Tetrachloride | 1 | 20 | 0 | 0 | 0 | 0 | 0 | 0 | 0 | 0 | 0 | 0 |
| Range-find | 111 | Carbon Tetrachloride | 1 | 43.1 | 0 | 0 | 0 | 1 | 0 | 0 | 0 | 0 | 0 | 1 |
| Range-find | 112 | Carbon Tetrachloride | 1 | 43.1 | 0 | 0 | 0 | 1 | 0 | 0 | 0 | 0 | 0 | 0 |
| Range-find | 113 | Carbon Tetrachloride | 1 | 43.1 | 0 | 0 | 0 | 1 | 0 | 0 | 0 | 0 | 0 | 0 |
| Range-find | 114 | Carbon Tetrachloride | 1 | 43.1 | 0 | 0 | 0 | 1 | 0 | 0 | 0 | 0 | 0 | 0 |
| Range-find | 115 | Carbon Tetrachloride | 1 | 43.1 | 0 | 0 | 0 | 0 | 0 | 0 | 0 | 0 | 0 | 0 |
| Range-find | 116 | Carbon Tetrachloride | 1 | 92.8 | 0 | 0 | 0 | 1 | 0 | 0 | 0 | 0 | 0 | 0 |
| Range-find | 117 | Carbon Tetrachloride | 1 | 92.8 | 0 | 0 | 0 | 1 | 0 | 0 | 0 | 0 | 0 | 0 |
| Range-find | 118 | Carbon Tetrachloride | 1 | 92.8 | 0 | 0 | 0 | 1 | 0 | 0 | 0 | 0 | 0 | 0 |
| Range-find | 119 | Carbon Tetrachloride | 1 | 92.8 | 0 | 0 | 0 | 1 | 0 | 0 | 0 | 0 | 0 | 1 |
| Range-find | 120 | Carbon Tetrachloride | 1 | 92.8 | 0 | 0 | 0 | 1 | 0 | 0 | 0 | 0 | 0 | 1 |
| Range-find | 121 | Carbon Tetrachloride | 1 | 200 | 0 | 0 | 0 | 2 | 0 | 0 | 0 | 0 | 0 | 2 |
| Range-find | 122 | Carbon Tetrachloride | 1 | 200 | 0 | 0 | 0 | 2 | 0 | 0 | 0 | 0 | 0 | 1 |
| Range-find | 123 | Carbon Tetrachloride | 1 | 200 | 0 | 0 | 0 | 2 | 0 | 0 | 0 | 0 | 0 | 2 |
| Range-find | 124 | Carbon Tetrachloride | 1 | 200 | 0 | 0 | 0 | 1 | 0 | 0 | 0 | 0 | 0 | 1 |
| Range-find | 125 | Carbon Tetrachloride | 1 | 200 | 0 | 0 | 0 | 2 | 0 | 0 | 0 | 0 | 0 | 2 |
| Range-find | 126 | Carbon Tetrachloride | 5 | 0 | 0 | 0 | 0 | 0 | 0 | 0 | 0 | 0 | 0 | 0 |
| Range-find | 127 | Carbon Tetrachloride | 5 | 0 | 0 | 0 | 0 | 1 | 0 | 0 | 0 | 0 | 0 | 0 |
| Range-find | 128 | Carbon Tetrachloride | 5 | 0 | 0 | 0 | 0 | 0 | 0 | 0 | 0 | 0 | 0 | 0 |
| Range-find | 129 | Carbon Tetrachloride | 5 | 0 | 0 | 0 | 0 | 1 | 0 | 0 | 0 | 0 | 0 | 0 |
| Range-find | 130 | Carbon Tetrachloride | 5 | 0 | 0 | 0 | 0 | 1 | 0 | 0 | 0 | 0 | 0 | 0 |
| Range-find | 131 | Carbon Tetrachloride | 5 | 20 | 0 | 0 | 0 | 1 | 0 | 0 | 1 | 0 | 0 | 1 |
| Range-find | 132 | Carbon Tetrachloride | 5 | 20 | 0 | 0 | 0 | 0 | 0 | 0 | 1 | 0 | 0 | 2 |
| Range-find | 133 | Carbon Tetrachloride | 5 | 20 | 0 | 0 | 0 | 1 | 0 | 0 | 0 | 0 | 0 | 2 |
| Range-find | 134 | Carbon Tetrachloride | 5 | 20 | 0 | 0 | 0 | 1 | 0 | 0 | 0 | 0 | 1 | 2 |
| Range-find | 135 | Carbon Tetrachloride | 5 | 20 | 0 | 0 | 0 | 0 | 0 | 0 | 1 | 0 | 1 | 2 |
| Range-find | 136 | Carbon Tetrachloride | 5 | 43.1 | 0 | 0 | 0 | 0 | 0 | 0 | 1 | 0 | 1 | 2 |
| Range-find | 137 | Carbon Tetrachloride | 5 | 43.1 | 0 | 0 | 0 | 1 | 0 | 0 | 2 | 0 | 0 | 2 |
| Range-find | 138 | Carbon Tetrachloride | 5 | 43.1 | 0 | 0 | 1 | 1 | 0 | 0 | 1 | 0 | 0 | 2 |
| Range-find | 139 | Carbon Tetrachloride | 5 | 43.1 | 0 | 0 | 0 | 1 | 0 | 0 | 3 | 0 | 1 | 2 |
| Range-find | 140 | Carbon Tetrachloride | 5 | 43.1 | 0 | 0 | 0 | 2 | 0 | 0 | 0 | 0 | 1 | 2 |
| Range-find | 141 | Carbon Tetrachloride | 5 | 92.8 | 0 | 0 | 1 | 1 | 0 | 0 | 3 | 0 | 2 | 3 |
| Range-find | 142 | Carbon Tetrachloride | 5 | 92.8 | 0 | 0 | 0 | 1 | 0 | 0 | 3 | 0 | 0 | 3 |
| Range-find | 143 | Carbon Tetrachloride | 5 | 92.8 | 0 | 0 | 0 | 2 | 0 | 0 | 2 | 0 | 2 | 3 |
| Range-find | 144 | Carbon Tetrachloride | 5 | 92.8 | 0 | 0 | 0 | 2 | 0 | 0 | 1 | 0 | 1 | 3 |
| Range-find | 145 | Carbon Tetrachloride | 5 | 92.8 | 0 | 0 | 1 | 1 | 0 | 0 | 2 | 0 | 2 | 3 |
| Range-find | 146 | Carbon Tetrachloride | 5 | 200 | 0 | 0 | 0 | 1 | 0 | 0 | 3 | 0 | 1 | 3 |
| Range-find | 147 | Carbon Tetrachloride | 5 | 200 | 0 | 0 | 1 | 1 | 0 | 0 | 3 | 0 | 2 | 3 |
| Range-find | 148 | Carbon Tetrachloride | 5 | 200 | 0 | 0 | 2 | 2 | 0 | 0 | 3 | 0 | 2 | 4 |
| Range-find | 149 | Carbon Tetrachloride | 5 | 200 | 0 | 0 | 1 | 2 | 0 | 0 | 2 | 0 | 2 | 3 |
| Range-find | 150 | Carbon Tetrachloride | 5 | 200 | 0 | 0 | 0 | 1 | 0 | 0 | 3 | 0 | 1 | 4 |
| Range-find | 151 | 4,4'-MDAa | 1 | 0 | 0 | 0 | 0 | 0 | 0 | 0 | 0 | 0 | 0 | 0 |
| Range-find | 152 | 4,4'-MDA | 1 | 0 | 0 | 0 | 0 | 1 | 0 | 0 | 0 | 0 | 0 | 0 |
| Range-find | 153 | 4,4'-MDA | 1 | 0 | 0 | 0 | 0 | 1 | 0 | 0 | 0 | 0 | 0 | 0 |
| Range-find | 154 | 4,4'-MDA | 1 | 0 | 0 | 0 | 0 | 1 | 0 | 0 | 0 | 0 | 0 | 0 |
| Range-find | 155 | 4,4'-MDA | 1 | 0 | 0 | 0 | 0 | 0 | 0 | 0 | 0 | 0 | 0 | 0 |
| Range-find | 156 | 4,4'-MDA | 1 | 22 | 0 | 0 | 0 | 0 | 0 | 0 | 0 | 0 | 0 | 0 |
| Range-find | 157 | 4,4'-MDA | 1 | 22 | 0 | 0 | 0 | 1 | 0 | 0 | 0 | 0 | 0 | 0 |
| Range-find | 158 | 4,4'-MDA | 1 | 22 | 0 | 0 | 0 | 0 | 0 | 0 | 0 | 0 | 0 | 0 |
| Range-find | 159 | 4,4'-MDA | 1 | 22 | 0 | 0 | 0 | 0 | 0 | 0 | 0 | 0 | 0 | 0 |
| Range-find | 160 | 4,4'-MDA | 1 | 22 | 0 | 0 | 0 | 1 | 0 | 0 | 1 | 0 | 0 | 0 |
| Range-find | 161 | 4,4'-MDA | 1 | 59.7 | 0 | 0 | 0 | 1 | 0 | 0 | 1 | 0 | 0 | 0 |
| Range-find | 162 | 4,4'-MDA | 1 | 59.7 | 0 | 0 | 0 | 0 | 0 | 0 | 1 | 0 | 0 | 0 |
| Range-find | 163 | 4,4'-MDA | 1 | 59.7 | 0 | 2 | 2 | 0 | 2 | 0 | 1 | 0 | 0 | 0 |
| Range-find | 164 | 4,4'-MDA | 1 | 59.7 | 0 | 2 | 1 | 0 | 3 | 0 | 0 | 0 | 0 | 0 |
| Range-find | 165 | 4,4'-MDA | 1 | 59.7 | 0 | 1 | 0 | 0 | 2 | 0 | 2 | 0 | 0 | 0 |
| Range-find | 166 | 4,4'-MDA | 1 | 162 | 0 | 1 | 0 | 0 | 2 | 1 | 0 | 0 | 0 | 0 |
| Range-find | 167 | 4,4'-MDA | 1 | 162 | 0 | 2 | 1 | 0 | 1 | 0 | 0 | 0 | 0 | 0 |
| Range-find | 168 | 4,4'-MDA | 1 | 162 | 0 | 2 | 0 | 0 | 2 | 3 | 3 | 0 | 0 | 0 |
| Range-find | 169 | 4,4'-MDA | 1 | 162 | 0 | 2 | 1 | 0 | 3 | 0 | 0 | 0 | 0 | 0 |
| Range-find | 170 | 4,4'-MDA | 1 | 162 | 0 | 0 | 0 | 1 | 0 | 0 | 0 | 0 | 0 | 0 |
| Range-find | 171 | 4,4'-MDA | 5 | 0 | 0 | 0 | 0 | 1 | 0 | 0 | 0 | 0 | 0 | 0 |
| Range-find | 172 | 4,4'-MDA | 5 | 0 | 0 | 0 | 0 | 0 | 0 | 0 | 0 | 0 | 0 | 0 |
| Range-find | 173 | 4,4'-MDA | 5 | 0 | 0 | 0 | 0 | 1 | 0 | 0 | 0 | 0 | 0 | 0 |
| Range-find | 174 | 4,4'-MDA | 5 | 0 | 0 | 0 | 0 | 0 | 0 | 0 | 0 | 0 | 0 | 0 |
| Range-find | 175 | 4,4'-MDA | 5 | 0 | 0 | 0 | 0 | 1 | 0 | 0 | 0 | 0 | 0 | 0 |
| Range-find | 176 | 4,4'-MDA | 5 | 22 | 0 | 0 | 0 | 0 | 0 | 0 | 0 | 0 | 0 | 0 |
| Range-find | 177 | 4,4'-MDA | 5 | 22 | 0 | 0 | 0 | 1 | 0 | 0 | 0 | 0 | 0 | 0 |
| Range-find | 178 | 4,4'-MDA | 5 | 22 | 0 | 0 | 1 | 0 | 0 | 0 | 0 | 0 | 0 | 0 |
| Range-find | 179 | 4,4'-MDA | 5 | 22 | 0 | 0 | 0 | 1 | 0 | 0 | 0 | 0 | 0 | 0 |
| Range-find | 180 | 4,4'-MDA | 5 | 22 | 0 | 0 | 0 | 0 | 1 | 0 | 0 | 0 | 0 | 0 |
| Range-find | 181 | 4,4'-MDA | 5 | 59.7 | 1 | 2 | 1 | 0 | 3 | 1 | 0 | 0 | 0 | 0 |
| Range-find | 182 | 4,4'-MDA | 5 | 59.7 | 1 | 2 | 1 | 0 | 3 | 2 | 2 | 0 | 0 | 0 |
| Range-find | 183 | 4,4'-MDA | 5 | 59.7 | 1 | 2 | 1 | 0 | 3 | 2 | 4 | 0 | 0 | 0 |
| Range-find | 184 | 4,4'-MDA | 5 | 59.7 | 1 | 3 | 1 | 0 | 3 | 2 | 1 | 0 | 0 | 0 |
| Range-find | 185 | 4,4'-MDA | 5 | 59.7 | 2 | 3 | 1 | 0 | 4 | 2 | 1 | 0 | 0 | 0 |
| Range-find | 186 | 4,4'-MDA | 5 | 162 | 1 | 3 | 1 | 0 | 3 | 1 | 0 | 0 | 0 | 0 |
| Range-find | 187 | 4,4'-MDA | 5 | 162 | 2 | 3 | 2 | 0 | 4 | 3 | 0 | 0 | 0 | 0 |
| Range-find | 188 | 4,4'-MDA | 5 | 162 | 2 | 3 | 2 | 0 | 4 | 2 | 1 | 0 | 0 | 0 |
| Range-find | 189 | 4,4'-MDA | 5 | 162 | 1 | 2 | 2 | 0 | 3 | 1 | 1 | 0 | 0 | 0 |
| Range-find | 190 | 4,4'-MDA | 5 | 162 | 1 | 2 | 1 | 0 | 3 | 2 | 3 | 0 | 0 | 0 |

a 4,4’-MDA, 4,4'-Methylenedianiline

| **Supplemental Table 3-2**. Histopathological scores for animals administered allyl alcohol or carbon tetrachloride for 5 or 14 days for Range-finding | | | | | | | | | | | | | |
| --- | --- | --- | --- | --- | --- | --- | --- | --- | --- | --- | --- | --- | --- |
| **Study** | **Animal Number** | **Toxicant** | **Day** | **Dose (mg/kg)** | **Fibrosis** | **Necrosis** | **Vacuolation, hepato (lipid-like)** | **Infiltrate, lympho-plasmacytic, portal** | **Infiltrate, PMN** | **Collagen Accumulation** | **Infiltrate, lympho, random** | **Hepato-cellular-lacy vac (glycogen)** | **Cystic Degeneration** |
| Range-find | 7B | Allyl Alcohol | 5 | 0 | 0 | 0 | 0 | 1 | 0 | 0 | 0 | 0 | 0 |
| Range-find | 7N | Allyl Alcohol | 5 | 0 | 0 | 0 | 0 | 0 | 0 | 0 | 0 | 0 | 0 |
| Range-find | 7T | Allyl Alcohol | 5 | 0 | 0 | 0 | 0 | 0 | 0 | 0 | 0 | 0 | 0 |
| Range-find | 8B | Allyl Alcohol | 5 | 0 | 0 | 0 | 0 | 0 | 0 | 0 | 0 | 0 | 0 |
| Range-find | 8T | Allyl Alcohol | 5 | 0 | 0 | 0 | 0 | 0 | 0 | 0 | 0 | 0 | 0 |
| Range-find | 3B | Allyl Alcohol | 5 | 45 | 3 | 3 | 2 | 0 | 3 | 0 | 0 | 2 | 1 |
| Range-find | 3N | Allyl Alcohol | 5 | 45 | 3 | 2 | 2 | 2 | 2 | 0 | 0 | 0 | 3 |
| Range-find | 3T | Allyl Alcohol | 5 | 45 | 3 | 3 | 0 | 0 | 0 | 0 | 0 | 2 | 2 |
| Range-find | 4B | Allyl Alcohol | 5 | 45 | 3 | 2 | 0 | 0 | 1 | 0 | 0 | 2 | 3 |
| Range-find | 4T | Allyl Alcohol | 5 | 45 | 3 | 3 | 0 | 0 | 1 | 0 | 0 | 2 | 3 |
| Range-find | 9B | Allyl Alcohol | 14 | 0 | 0 | 0 | 0 | 0 | 0 | 0 | 0 | 1 | 0 |
| Range-find | 9N | Allyl Alcohol | 14 | 0 | 0 | 0 | 0 | 0 | 0 | 0 | 0 | 1 | 0 |
| Range-find | 9T | Allyl Alcohol | 14 | 0 | 0 | 0 | 0 | 0 | 0 | 0 | 0 | 0 | 0 |
| Range-find | 10B | Allyl Alcohol | 14 | 0 | 1 | 0 | 0 | 1 | 0 | 0 | 1 | 0 | 0 |
| Range-find | 10T | Allyl Alcohol | 14 | 0 | 0 | 0 | 0 | 0 | 0 | 0 | 1 | 0 | 0 |
| Range-find | 1B | Allyl Alcohol | 14 | 45 | 1 | 0 | 0 | 1 | 1 | 0 | 0 | 2 | 1 |
| Range-find | 1N | Allyl Alcohol | 14 | 45 | 3 | 2 | 0 | 2 | 0 | 0 | 0 | 4 | 0 |
| Range-find | 2B | Allyl Alcohol | 14 | 45 | 4 | 2 | 0 | 3 | 0 | 0 | 0 | 5 | 1 |
| Range-find | 2N | Allyl Alcohol | 14 | 45 | 3 | 1 | 0 | 3 | 0 | 0 | 0 | 3 | 0 |
| Range-find | 1Ta | Allyl Alcohol | 14 | 45 | Not Evaluated | Not Evaluated | Not Evaluated | Not Evaluated | Not Evaluated | Not Evaluated | Not Evaluated | Not Evaluated | Not Evaluated |
| Range-find | 7B | Carbon Tetrachloride | 5 | 0 | 1 | 0 | 0 | 1 | 0 | 0 | 0 | 0 | 0 |
| Range-find | 7N | Carbon Tetrachloride | 5 | 0 | 0 | 0 | 0 | 0 | 0 | 0 | 0 | 0 | 0 |
| Range-find | 7T | Carbon Tetrachloride | 5 | 0 | 0 | 0 | 0 | 0 | 0 | 0 | 0 | 0 | 0 |
| Range-find | 8B | Carbon Tetrachloride | 5 | 0 | 0 | 0 | 0 | 0 | 0 | 0 | 0 | 0 | 0 |
| Range-find | 8T | Carbon Tetrachloride | 5 | 0 | 0 | 0 | 0 | 0 | 0 | 0 | 0 | 0 | 0 |
| Range-find | 11B | Carbon Tetrachloride | 5 | 200 | 1 | 0 | 3 | 1 | 0 | 0 | 0 | 0 | 0 |
| Range-find | 11N | Carbon Tetrachloride | 5 | 200 | 0 | 0 | 3 | 0 | 0 | 0 | 0 | 0 | 0 |
| Range-find | 11T | Carbon Tetrachloride | 5 | 200 | 1 | 0 | 4 | 0 | 0 | 0 | 0 | 0 | 0 |
| Range-find | 12B | Carbon Tetrachloride | 5 | 200 | 1 | 0 | 4 | 0 | 0 | 0 | 1 | 0 | 0 |
| Range-find | 12T | Carbon Tetrachloride | 5 | 200 | 1 | 0 | 2 | 0 | 1 | 0 | 0 | 0 | 0 |
| Range-find | 9B | Carbon Tetrachloride | 14 | 0 | 0 | 0 | 0 | 0 | 0 | 0 | 0 | 0 | 0 |
| Range-find | 9N | Carbon Tetrachloride | 14 | 0 | 0 | 0 | 0 | 0 | 0 | 0 | 0 | 0 | 0 |
| Range-find | 9T | Carbon Tetrachloride | 14 | 0 | 0 | 0 | 0 | 0 | 0 | 0 | 0 | 0 | 0 |
| Range-find | 10B | Carbon Tetrachloride | 14 | 0 | 1 | 0 | 0 | 1 | 0 | 0 | 1 | 1 | 0 |
| Range-find | 10T | Carbon Tetrachloride | 14 | 0 | 0 | 0 | 0 | 0 | 0 | 0 | 1 | 1 | 0 |
| Range-find | 5B | Carbon Tetrachloride | 14 | 200 | 1 | 2 | 4 | 0 | 0 | 0 | 0 | 0 | 3 |
| Range-find | 5N | Carbon Tetrachloride | 14 | 200 | 1 | 0 | 4 | 0 | 0 | 0 | 0 | 0 | 3 |
| Range-find | 5T | Carbon Tetrachloride | 14 | 200 | 1 | 2 | 4 | 0 | 0 | 0 | 0 | 0 | 3 |
| Range-find | 6N | Carbon Tetrachloride | 14 | 200 | 1 | 2 | 4 | 0 | 0 | 0 | 0 | 0 | 3 |
| Range-find | 6T | Carbon Tetrachloride | 14 | 200 | 1 | 1 | 4 | 0 | 0 | 0 | 0 | 0 | 2 |
| aAnimal 1T died prior to study termination | | | | | | | | | | |  |  |  |

| **Supplemental Table 3-2**. Histopathological scores for animals administered allyl alcohol or carbon tetrachloride for 5 or 14 days for Range-finding | | | | | | | | | | | | | |
| --- | --- | --- | --- | --- | --- | --- | --- | --- | --- | --- | --- | --- | --- |
| **Study** | **Animal Number** | **Toxicant** | **Day** | **Dose (mg/kg)** | **Pigment, hepatocellular, portal** | **Lakes of plasma** | **Biliary Hyperplasia** | **Fibroplasia** | **Calcification** | **Capsule/ Mesothelial Fibrosis** | **Portal Bridging** | **Ectatic Lymphatics, Portal** | **Hepato-cellular hyperplasia** |
| Range-find | 7B | Allyl Alcohol | 5 | 0 | 0 | 0 | 0 | 0 | 0 | 0 | 0 | 0 | 0 |
| Range-find | 7N | Allyl Alcohol | 5 | 0 | 0 | 0 | 0 | 0 | 0 | 0 | 0 | 0 | 0 |
| Range-find | 7T | Allyl Alcohol | 5 | 0 | 0 | 0 | 0 | 0 | 0 | 0 | 0 | 0 | 0 |
| Range-find | 8B | Allyl Alcohol | 5 | 0 | 0 | 0 | 0 | 0 | 0 | 0 | 0 | 0 | 0 |
| Range-find | 8T | Allyl Alcohol | 5 | 0 | 0 | 0 | 0 | 0 | 0 | 0 | 0 | 0 | 0 |
| Range-find | 3B | Allyl Alcohol | 5 | 45 | 0 | 0 | 3 | 3 | 3 | 0 | 0 | 0 | 2 |
| Range-find | 3N | Allyl Alcohol | 5 | 45 | 0 | 0 | 3 | 2 | 0 | 0 | 0 | 0 | 3 |
| Range-find | 3T | Allyl Alcohol | 5 | 45 | 0 | 0 | 3 | 2 | 0 | 0 | 0 | 2 | 3 |
| Range-find | 4B | Allyl Alcohol | 5 | 45 | 0 | 0 | 2 | 2 | 0 | 0 | 0 | 2 | 3 |
| Range-find | 4T | Allyl Alcohol | 5 | 45 | 0 | 0 | 3 | 2 | 0 | 0 | 0 | 2 | 3 |
| Range-find | 9B | Allyl Alcohol | 14 | 0 | 0 | 0 | 0 | 0 | 0 | 0 | 0 | 0 | 0 |
| Range-find | 9N | Allyl Alcohol | 14 | 0 | 0 | 0 | 0 | 0 | 0 | 0 | 0 | 0 | 0 |
| Range-find | 9T | Allyl Alcohol | 14 | 0 | 0 | 0 | 0 | 0 | 0 | 0 | 0 | 0 | 0 |
| Range-find | 10B | Allyl Alcohol | 14 | 0 | 0 | 0 | 0 | 0 | 0 | 0 | 0 | 0 | 0 |
| Range-find | 10T | Allyl Alcohol | 14 | 0 | 0 | 0 | 0 | 0 | 0 | 0 | 0 | 0 | 0 |
| Range-find | 1B | Allyl Alcohol | 14 | 45 | 1 | 1 | 2 | 3 | 0 | 0 | 2 | 0 | 2 |
| Range-find | 1N | Allyl Alcohol | 14 | 45 | 0 | 1 | 3 | 2 | 0 | 0 | 2 | 1 | 2 |
| Range-find | 2B | Allyl Alcohol | 14 | 45 | 1 | 0 | 3 | 3 | 0 | 0 | 2 | 1 | 1 |
| Range-find | 2N | Allyl Alcohol | 14 | 45 | 0 | 0 | 4 | 4 | 0 | 0 | 3 | 0 | 2 |
| Range-find | 1T | Allyl Alcohol | 14 | 45 | Not Evaluated | Not Evaluated | Not Evaluated | Not Evaluated | Not Evaluated | Not Evaluated | Not Evaluated | Not Evaluated | Not Evaluated |
| Range-find | 7B | Carbon Tetrachloride | 5 | 0 | 0 | 0 | 0 | 0 | 0 | 0 | 0 | 0 | 0 |
| Range-find | 7N | Carbon Tetrachloride | 5 | 0 | 0 | 0 | 0 | 0 | 0 | 0 | 0 | 0 | 0 |
| Range-find | 7T | Carbon Tetrachloride | 5 | 0 | 0 | 0 | 0 | 0 | 0 | 0 | 0 | 0 | 0 |
| Range-find | 8B | Carbon Tetrachloride | 5 | 0 | 0 | 0 | 0 | 0 | 0 | 0 | 0 | 0 | 0 |
| Range-find | 8T | Carbon Tetrachloride | 5 | 0 | 0 | 0 | 0 | 0 | 0 | 0 | 0 | 0 | 0 |
| Range-find | 11B | Carbon Tetrachloride | 5 | 200 | 0 | 0 | 0 | 0 | 0 | 0 | 0 | 0 | 0 |
| Range-find | 11N | Carbon Tetrachloride | 5 | 200 | 0 | 0 | 0 | 0 | 0 | 0 | 0 | 0 | 0 |
| Range-find | 11T | Carbon Tetrachloride | 5 | 200 | 0 | 0 | 0 | 0 | 0 | 0 | 0 | 0 | 0 |
| Range-find | 12B | Carbon Tetrachloride | 5 | 200 | 0 | 0 | 0 | 0 | 0 | 0 | 0 | 0 | 0 |
| Range-find | 12T | Carbon Tetrachloride | 5 | 200 | 0 | 3 | 0 | 0 | 0 | 0 | 0 | 0 | 0 |
| Range-find | 9B | Carbon Tetrachloride | 14 | 0 | 0 | 0 | 0 | 0 | 0 | 0 | 0 | 0 | 0 |
| Range-find | 9N | Carbon Tetrachloride | 14 | 0 | 0 | 0 | 0 | 0 | 0 | 0 | 0 | 0 | 0 |
| Range-find | 9T | Carbon Tetrachloride | 14 | 0 | 0 | 0 | 0 | 0 | 0 | 0 | 0 | 0 | 0 |
| Range-find | 10B | Carbon Tetrachloride | 14 | 0 | 0 | 0 | 0 | 0 | 0 | 0 | 0 | 0 | 0 |
| Range-find | 10T | Carbon Tetrachloride | 14 | 0 | 0 | 0 | 0 | 0 | 0 | 0 | 0 | 0 | 0 |
| Range-find | 5B | Carbon Tetrachloride | 14 | 200 | 0 | 0 | 0 | 0 | 0 | 0 | 0 | 0 | 0 |
| Range-find | 5N | Carbon Tetrachloride | 14 | 200 | 0 | 0 | 0 | 0 | 0 | 0 | 0 | 0 | 0 |
| Range-find | 5T | Carbon Tetrachloride | 14 | 200 | 0 | 0 | 0 | 0 | 0 | 0 | 0 | 0 | 1 |
| Range-find | 6N | Carbon Tetrachloride | 14 | 200 | 0 | 0 | 0 | 0 | 0 | 0 | 0 | 0 | 1 |
| Range-find | 6T | Carbon Tetrachloride | 14 | 200 | 0 | 0 | 0 | 0 | 0 | 0 | 0 | 0 | 2 |
